# Supplementary material for: Enhanced electrochemical activities of morphologically tuned MnFe2O4 nanoneedles and nanoparticles integrated on reduced graphene oxide for highly efficient supercapacitor electrodes
Source: Royal Society of Chemistry journal article supplement (doi:10.1039/d1na00144b), 2021-01-01
Supplement: d1na00144b1.pdf [file d1na00144b1.pdf]

Supporting Information

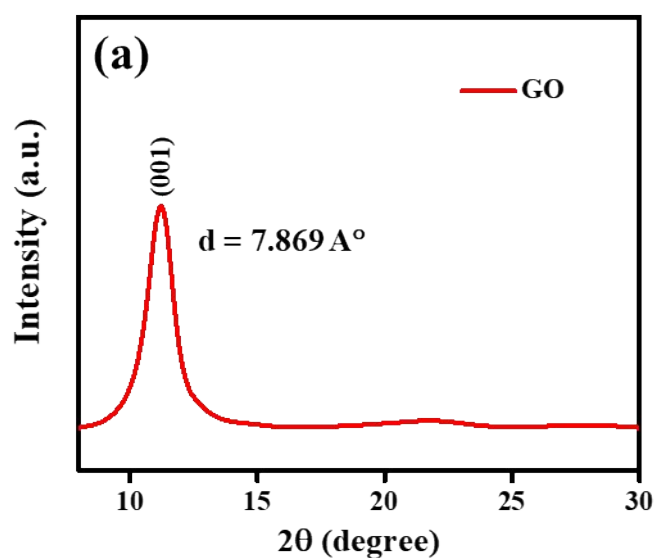

**Fig S1.** The XRD diffractogram of graphene oxide with the calculated lattice spacing.

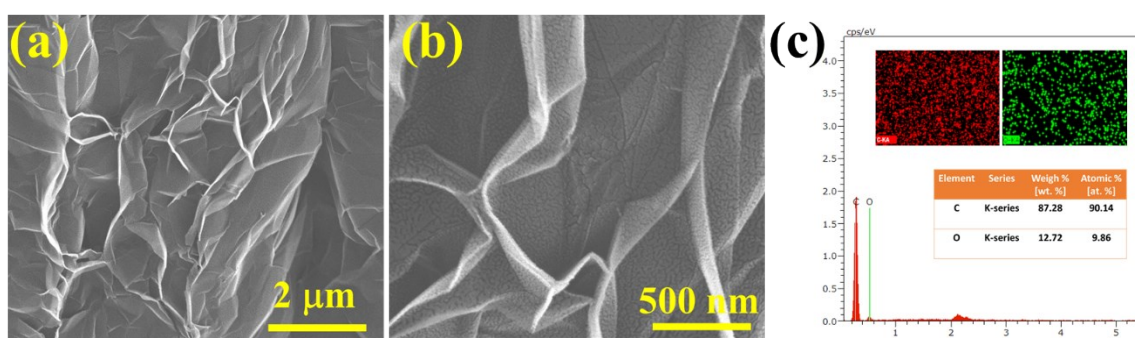

**Fig S2.** (a-b) FESEM image of graphene oxide (GO) at different magnifications. (c) EDX spectra of Graphene oxide (Inset representing the corresponding mapping and elemental analysis based on weight % of elements present).

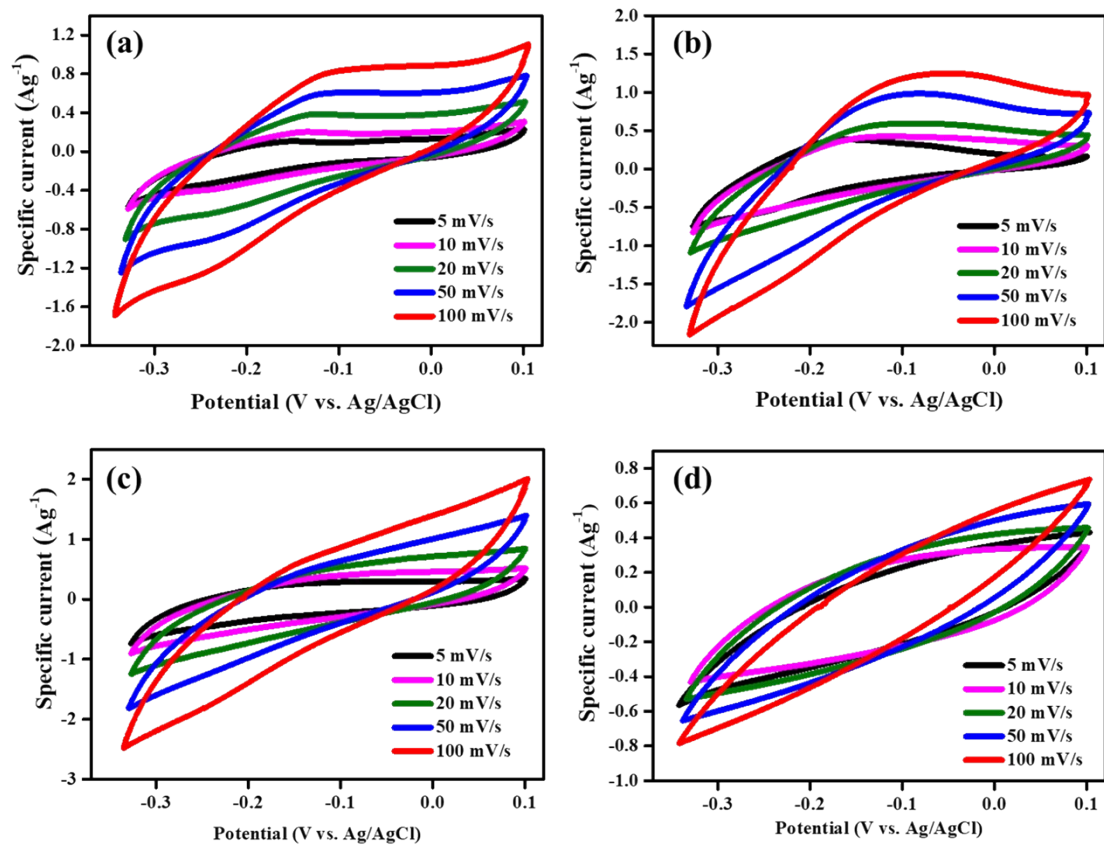

**Fig S3.** Cyclic voltammograms of (a) MnFe<sub>2</sub>O<sub>4</sub> nanoparticles, (b) MnFe<sub>2</sub>O<sub>4</sub> nanoneedles, (c) MnFe<sub>2</sub>O<sub>4</sub>/rGO nanoparticles and (d) Graphene oxide at various scan rates extending from 5-100 mVs<sup>-1</sup>.

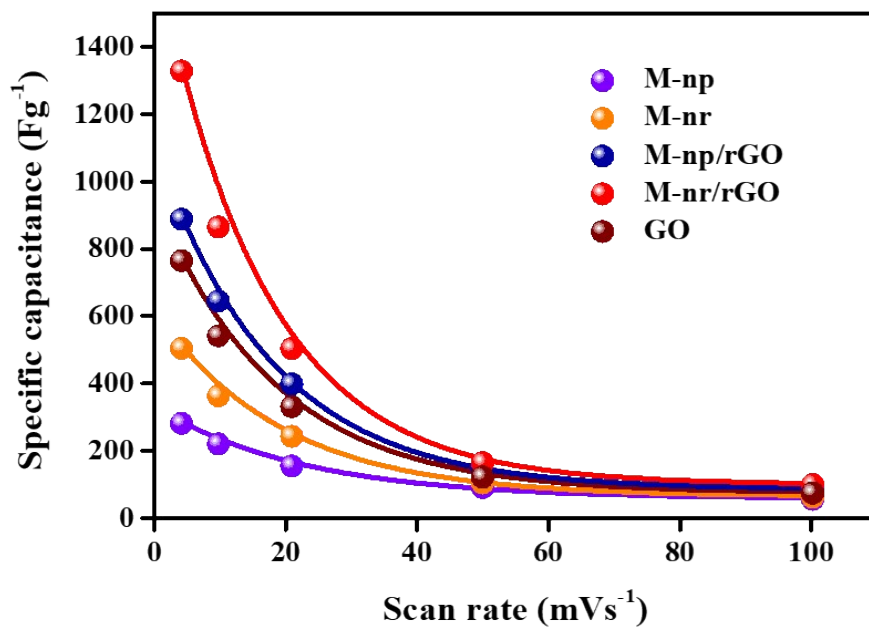

**Fig S4.** The Specific capacitance calculated from cyclic voltammograms of all the samples at different scan rates.

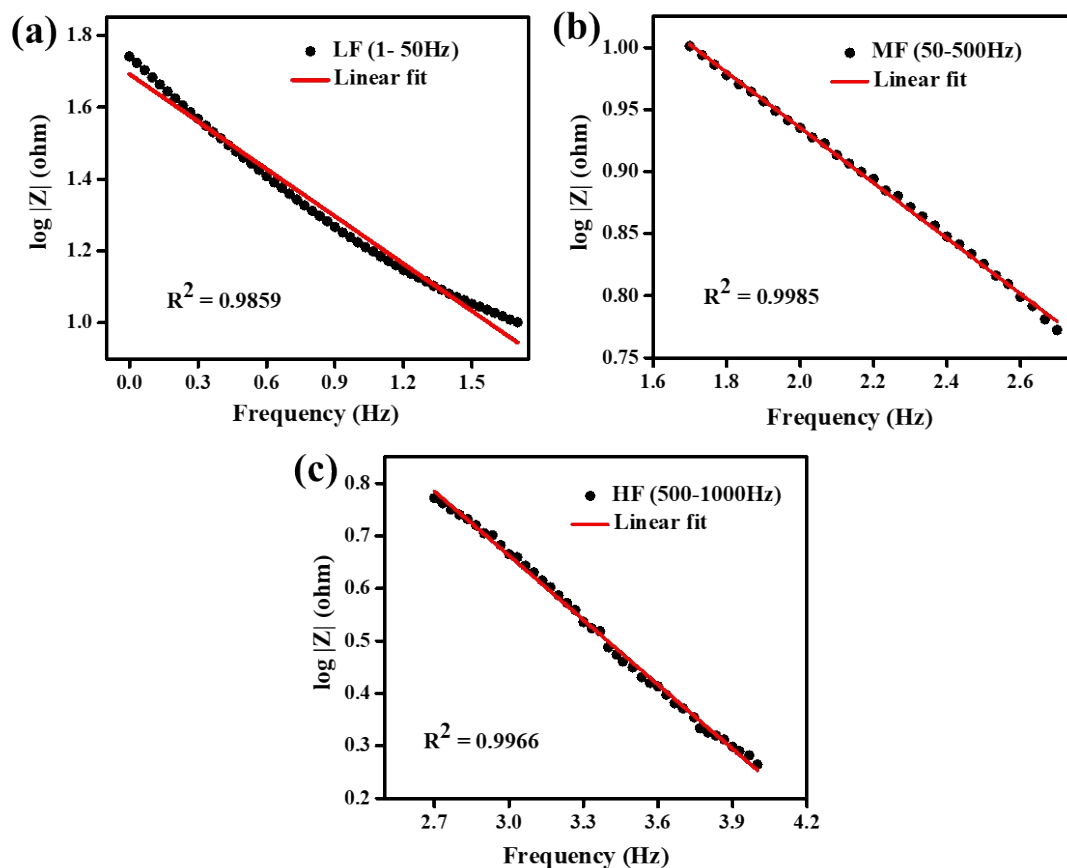

**Fig S5.** The slope of Impedance Bode plot of M-nr/rGO nanocomposite at (a) Low frequency region, (b) Mid frequency region, (c) High frequency region.

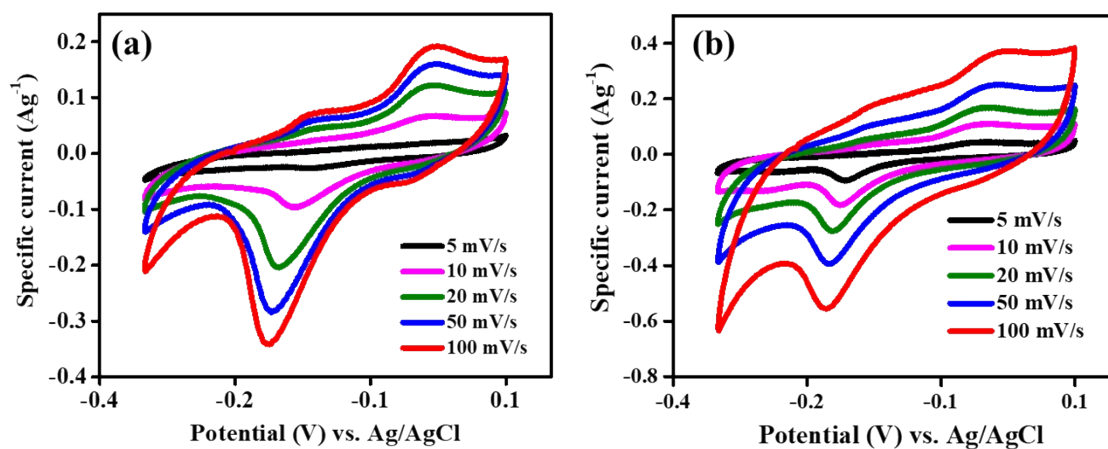

**Fig S6.** The cyclic voltammograms of (a) MnFe<sub>2</sub>O<sub>4</sub>/rGO nanoparticles and (b) MnFe<sub>2</sub>O<sub>4</sub>/rGO nanoneedles deposited on Cu substrate recorded at various scan rates from 5-100 mVs<sup>-1</sup>.
